# Supplementary material for: A layered aluminum-based metal–organic framework as a superior trap for nitrobenzene capture via an intercalation role
Source: Royal Society of Chemistry journal article supplement (doi:10.1039/c9nr09876c), 2020-01-01
Supplement: c9nr09876c1.pdf [file c9nr09876c1.pdf]

## Supporting Information

### Layered Aluminum-based Metal-Organic Framework as a Superior Trap for Nitrobenzene Capture *via* an Intercalation Role

Qi Zhang <sup>a,b,1</sup>, Meipeng Jian <sup>c,1</sup>, Pin Zhao <sup>d</sup>, Chengzhi Hu <sup>a,e\*</sup>, Jiuhui Qu <sup>a,d,e</sup>, Xiuyu Li <sup>f</sup>,  
Jiukun Hu <sup>f</sup>, Ruiping Liu <sup>a,e</sup>, Xiwang Zhang <sup>c\*</sup>

<sup>a</sup> State Key Laboratory of Environmental Aquatic Chemistry, Research Center for Eco-Environmental Sciences, Chinese Academy of Sciences, Beijing, 100085, China

<sup>b</sup> School of Environment, Northeast Normal University, Changchun 1130117, Jilin, China

<sup>c</sup> Department of Chemical Engineering, Monash University, Clayton, VIC 3800, Australia

<sup>d</sup> Center for Water and Ecology, State Key Joint Laboratory of Environment Simulation and Pollution Control, School of Environment, Tsinghua University, Beijing 100084, China

<sup>e</sup> University of Chinese Academy of Sciences, Beijing 100049, China

<sup>f</sup> Jiangsu Easthigh Environmental Holdings Co. Ltd., Zhenjiang 212431, China

<sup>1</sup> These authors contributed equally to this work.

\*Correspondence to Emails:

Prof. Chengzhi Hu  
E-mail: [czhu@rcees.ac.cn](mailto:czhu@rcees.ac.cn)

Prof. Xiwang Zhang  
E-mail: [Xiwang.Zhang@monash.edu](mailto:Xiwang.Zhang@monash.edu)

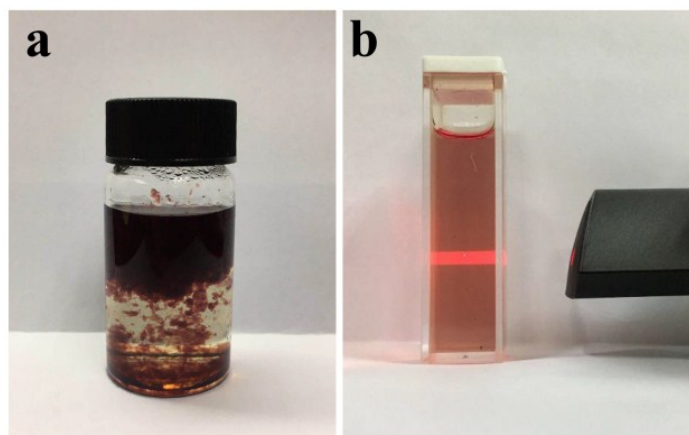

**Fig. S1** (a) Digital photos of as-synthesized Al-TCPP suspension. (b) Tyndall effect of colloidal layered Al-TCPP suspension in DMF after sonication.

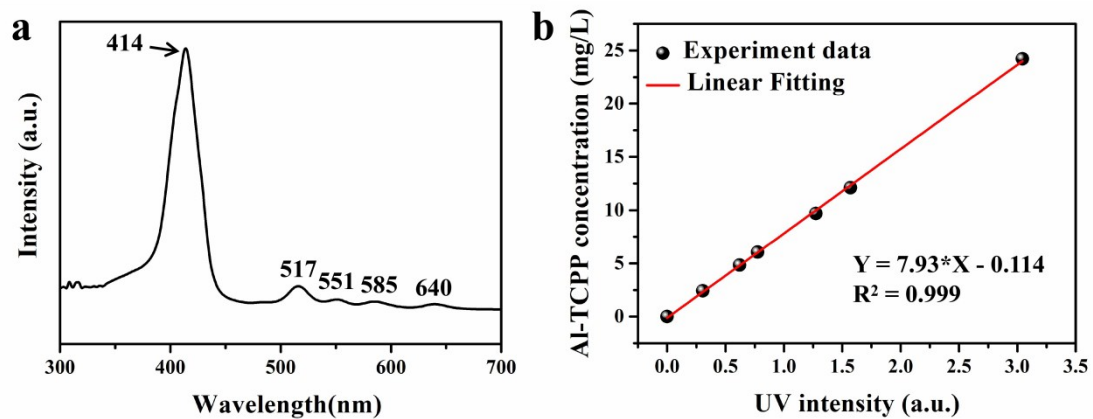

**Fig. S2** (a) The wavelength scanning and (b) the standard curve of layered Al-TCPP dispersion by UV-Vis.

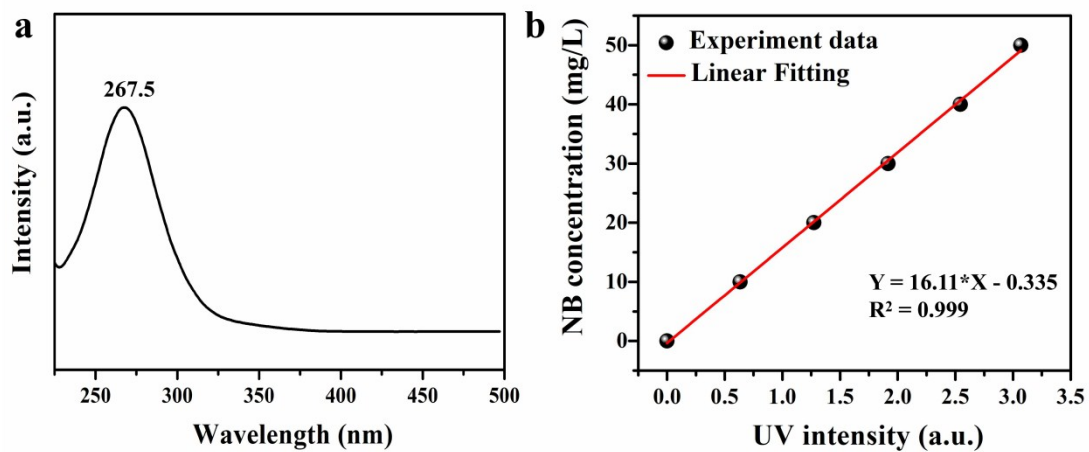

**Fig. S3** (a) The wavelength scanning and (b) the standard curve of NB aqueous by UV-Vis.

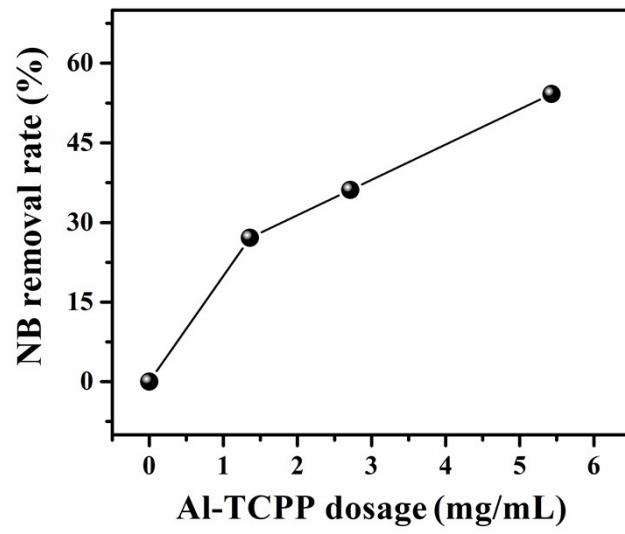

**Fig. S4** Effect of layered Al-TCPP dosage on the removal rate of NB.

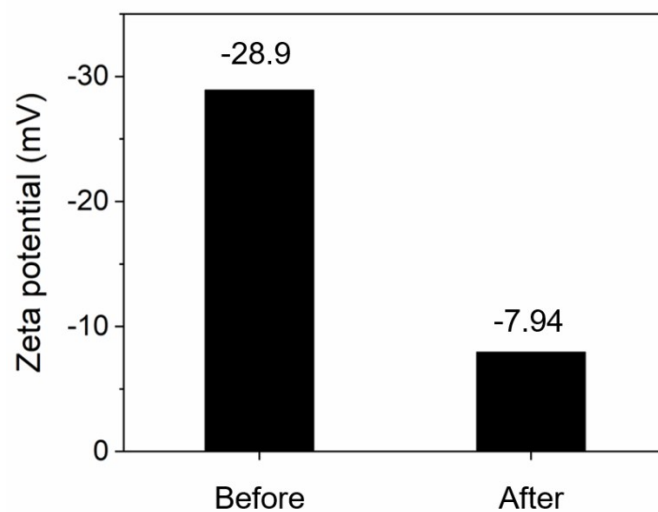

**Fig. S5** Zeta potential of layered Al-TCPP before and after NB adsorption at pH = ~6.0.

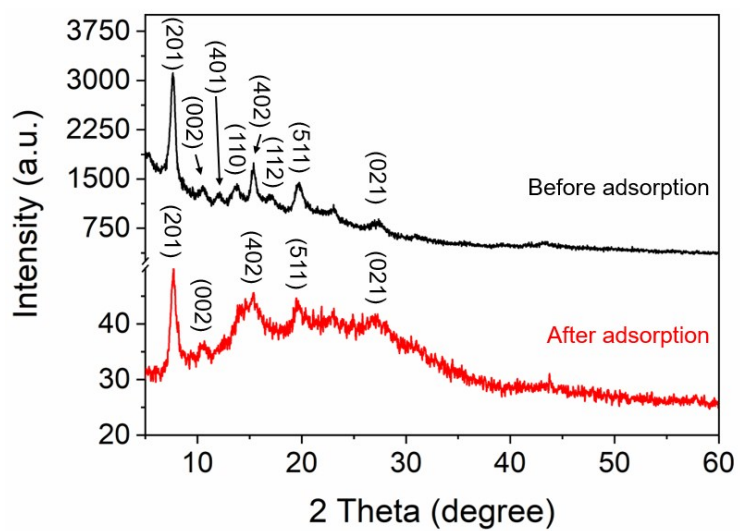

**Fig. S6** XRD patterns comparison of layered Al-TCPP before and after adsorption from the whole scale.

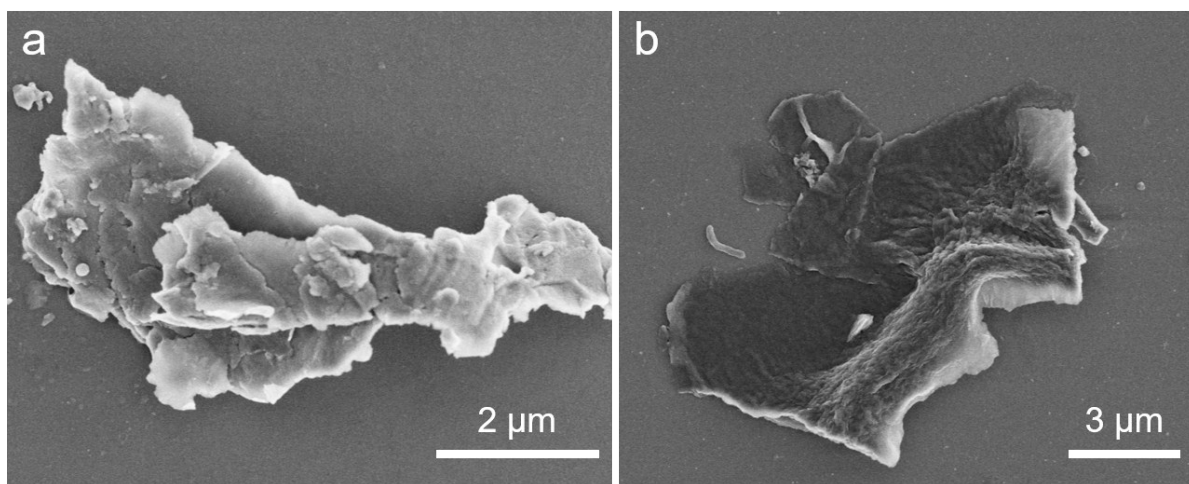

**Fig. S7** SEM images of layered Al-TCPP after NB adsorption with different initial concentrations. (a)  $C_0 = 200$  mg/L, (b)  $C_0 = 1500$  mg/L.



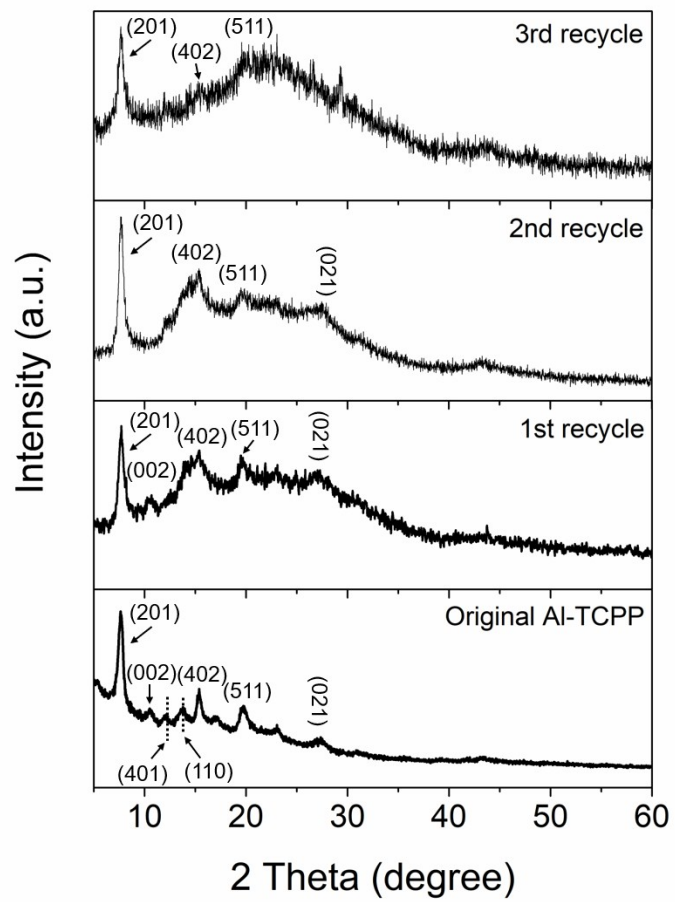

**Fig. S8** XRD patterns of layered Al-TCPP after different regeneration recycles.

**Table S1.** Parameters of adsorption isotherms for NB adsorption on layered Al-TCPP.

| Model    | Parameter |         |       |
|----------|-----------|---------|-------|
| Langmuir | $Q_0$     | $K_L$   | $R^2$ |
|          | 1846.7    | 9.42E-4 | 0.950 |

**Table S2.** Comparison of the NB adsorption performance with other adsorbents.

| Material                                               | Adsorption saturation time/min | Maximum adsorption capacity/mg g <sup>-1</sup> | Ref.      |
|--------------------------------------------------------|--------------------------------|------------------------------------------------|-----------|
| Layered Al-TCPP                                        | 1                              | 1846.7                                         | This work |
| Modified MCM-41(Al-C)                                  | 1                              | 243.9                                          | 1         |
| Modified MCM-41(CH <sub>3</sub> -MCM-41)               | 1                              | 46.1                                           | 2         |
| Nanocrystalline hydroxyapatite(HAP)                    | 1                              | 5.754                                          | 3         |
| MCM-41(Si-C)                                           | 1                              | 0.263                                          | 4         |
| Rice husk (RHC)                                        | 5                              | 446                                            | 5         |
| Carbon materials(from the combustion of woody biomass) | 5                              | 294                                            | 6         |
| Cotton fibers                                          | 5                              | 17.91                                          | 7         |
| Reduced graphene oxide (RGO)                           | 12                             | 260.945 ± 8.861                                | 8         |
| MIL-53(Al)                                             | 20                             | 610                                            | 9         |
| CH <sub>3</sub> O-SBA-15                               | 20                             | 1.28                                           | 10        |
| Silica aerogel                                         | 45                             | 7.29                                           | 11        |
| MIL-68(Al)                                             | 60                             | 1130 ± 10                                      | 12        |
| CAU-1                                                  | 60                             | 970 ± 10                                       | 12        |
| Furnace ash                                            | 90                             | 0.232                                          | 13        |
| Activated carbon <sub>NO-T</sub>                       | 120                            | 1443.53                                        | 14        |
| Modified activated sludge                              | 120                            | 25                                             | 15        |
| Oxidized activated carbon(OxOG-AC)                     | 300                            | 393.952                                        | 16        |
| Organoclay(stearyl dimethyl benzylammonium chloride)   | 300                            | 290                                            | 17        |
| Organoclay                                             | 300                            | 100                                            | 18        |
| Activated carbon commercial (ACC)                      | 300                            | 90                                             | 19        |
| Hypercrosslinked resin(CH-10)                          | 360                            | 543.7±41.7                                     | 20        |
| Marine sediment                                        | 360                            | 1.635                                          | 21        |
| Magnetically separable porous carbon                   | 420                            | 100                                            | 22        |
| Lipoid adsorption material (LAM)                       | 480                            | 1.22                                           | 23        |
| MC(W-70A)                                              | 1000                           | 98.5                                           | 24        |
| MIL-101                                                | 1440                           | 33                                             | 25        |
| Polystyrene(50 μm)                                     | 2880                           | 1.4                                            | 26        |
| Crop biological waste(biosorption)                     | 4320                           | 1.5                                            | 27        |

## References

1. F. Nezampour, M. Ghiaci and K. Masoomi, *J. Chem. Eng. Data*, 2018, **63**, 1977-1986.
2. Q. D. Qin and Y. Xu, *Microporous Mesoporous Mat.*, 2016, **232**, 143-150.
3. W. Wei, R. Sun, J. Cui and Z. G. Wei, *Desalination*, 2010, **263**, 89-96.
4. Q. D. Qin, J. Ma and K. Liu, *J. Colloid Interface Sci.*, 2007, **315**, 80-86.
5. A. Dasgupta, J. Matos, H. Muramatsu, Y. Ono, V. Gonzalez, H. Liu, C. Rotella, K. Fujisawa, R. Cruz-Silva, Y. Hashimoto, M. Endo, K. Kaneko, L. R. Radovic and M. Terrones, *Carbon*, 2018, **139**, 833-844.
6. Y. J. Dai, Y. Mihara, S. Tanaka, K. Watanabe and N. Terui, *J. Hazard. Mater.*, 2010, **174**, 776-781.
7. Y. C. Wu, H. J. Qi, B. Z. Li, Z. H. Huang, W. Li and S. X. Liu, *Carbohydr. Polym.*, 2017, **155**, 294-302.
8. X. Chen and B. Chen, *Environ. Sci. Technol.*, 2015, **49**, 6181-6189.
9. D. V. Patil, P. B. S. Rallapalli, G. P. Dangi, R. J. Tayade, R. S. Somani and H. C. Bajaj, *Ind. Eng. Chem. Res.*, 2011, **50**, 10516-10524.
10. G. Li, B. D. Wang, W. N. Q. Xu, Y. L. Li, Y. F. Han and Q. Sun, *ACS Earth Space Chem.*, 2018, **2**, 246-255.
11. S. Cui, X. Y. Liu, Y. Liu, X. D. Shen, B. L. Lin, G. F. Han and Z. W. Wu, *Sci. China-Technol. Sci.*, 2010, **53**, 2367-2371.
12. L. T. Xie, D. H. Liu, H. L. Huang, Q. Y. Yang and C. L. Zhong, *Chem. Eng. J.*, 2014, **246**, 142-149.
13. J. Yin, L. Liu, L. G. Zhang and Z. S. Liu, *Environ. Eng. Sci.*, 2008, **25**, 643-648.
14. S. X. Liu and R. Wang, *J. Porous Mat.*, 2011, **18**, 99-106.
15. J. J. Pan and B. H. Guan, *J. Hazard. Mater.*, 2010, **183**, 341-346.
16. Y. Kato, M. Machida and H. Tatsumoto, *J. Colloid Interface Sci.*, 2008, **322**, 394-398.

17. C. Zlotea, D. Phanon, M. Mazaj, D. Heurtaux, V. Guillerm, C. Serre, P. Horcajada, T. Devic, E. Magnier, F. Cuevas, G. Ferey, P. L. Llewellyn and M. Latroche, *Dalton Trans.*, 2011, **40**, 4879-4881.
18. H. A. Patel, H. C. Bajaj and R. V. Jasra, *Ind. Eng. Chem. Res.*, 2009, **48**, 1051-1058.
19. M. S. Rauthula and V. C. Srivastava, *Chem. Eng. J.*, 2011, **168**, 35-43.
20. C. H. Wang, C. Xu, W. Z. Sun, F. S. Liu, S. T. Yu and M. Xian, *Water Sci. Technol.*, 2017, **76**, 2328-2336.
21. X. K. Zhao, G. P. Yang and X. C. Gao, *Chemosphere*, 2003, **52**, 917-925.
22. Y. F. Zhu, L. X. Zhang, F. M. Schappacher, R. Poettgen, J. L. Shi and S. Kaskel, *J. Phys. Chem. C*, 2008, **112**, 8623-8628.
23. Q. X. Wen, Z. Q. Chen, J. X. Lian, Y. J. Feng and N. Q. Ren, *J. Hazard. Mater.*, 2012, **209**, 226-232.
24. A. W. Marczewski, *Appl. Surf. Sci.*, 2007, **253**, 5818-5826.
25. B. N. Bhadra, K. H. Cho, N. A. Khan, D. Y. Hong and S. H. Jung, *J. Phys. Chem. C*, 2015, **119**, 26620-26627.
26. J. Wang, X. H. Liu, G. N. Liu, Z. X. Zhang, H. Wu, B. S. Cui, J. H. Bai and W. Zhang, *Ecotox. Environ. Safe.*, 2019, **173**, 331-338.
27. S. R. Wang, S. W. Yang, X. C. Jin, L. K. Liu and F. C. Wu, *Desalination*, 2010, **264**, 32-36.
